# Supplementary material for: Palladium-catalyzed tandem C,N-arylation of immobilized enamine for solid phase indole synthesisElectronic supplementary information (ESI) available: experimental procedures. See http://www.rsc.org/suppdata/p1/b2/b206378f/
Source: Royal Society of Chemistry journal article supplement (doi:10.1039/b206378f), 2002-08-30
Supplement: b206378f.doc [file b206378f.doc]

**Supplementary Information**

For

Palladium-Catalyzed Tandem C,N-Arylation of Immobilized Enamine for Solid Phase Indole Synthesis

**Experimental Procedures**

**General Comments**

All reactions were carried out under an argon atmosphere. Tetrahydrofuran was distilled from benzophenone ketyl under an argon atmosphere. Other dry solvents and all reagents were purchased from commercial source and were used without further purification. Hydroxymethyl polystyrene resin (1% divinylbenzene; Product No. 01-64-0110) was purchased from Calbiochem-Novabiochem Corp. 1H-NMR (300MHz) spectra were recorded on Varian Gemini 2000 using tetramethylsilane as internal standard. 13C-NMR (100MHz) spectra were recorded on JEOL JNM-EX400 using tetramethylsilane as internal standard. Chemical shifts are expressed in  (ppm) values, and coupling constants are expressed in hertz (Hz). The following abbreviations are used: s=singlet, d=doublet, dd=double doublet, m=multiplet and brs=broad singlet. Mass spectra were recorded on a JEOL JMS-DX303 or JEOL JMS-AX500 spectrometers. IR spectra were measured with SensIR ATR FT-IR.

***N*-Cbz--(2-bromophenyl)-α-dehydroalanine methyl ester 1a**

To a mixture of *N*-benzyloxycarbonyl-α-dehydroalanine methyl ester1 (524 mg, 2.22 mmol), 1-bromo-2-iodobenzene (0.24 ml, 1.85 mmol) and tris(dibenzylideneacetone)dipalladium(0) (34 mg, 0.037 mmol) in DMF (3.8 ml) was added triethylamine (0.3ml, 2.22mmol) at room temperature. The whole mixture was stirred for 9 hr at 100 C. After cooling, the solution was poured into water, extracted with ethyl acetate and washed with water (x 2), brine, and then dried over Na2SO4 and concentrated in vacuo to give crude product. The crude product was purified by chromatography on silica gel using hexane:ethyl acetate (4:1) to afford 620 mg (86%) of **1a** as a colorless solid.

mp 71-73C (diethyl ether-hexane). 1H-NMR (CDCl3)  (ppm): 3.86 (3H, s), 5.05 (2H, s), 6.42 (1H, brs), 7.13-7.38 (7H, m), 7.40 (1H, s), 7.48 (1H, d, *J* = 7.7 Hz), 7.60 (1H, d, *J* = 7.7 Hz). IR  cm-1: 3242, 1731, 1688, 1503. MS *m/z*: 389 (M+). HRMS Calcd for C18H16BrNO4: 389.0263, Found: 389.0258. Anal. Calcd for C18H16BrNO4:C, 55.40; H, 4.13; N, 3.59. Found: C, 55.63; H, 4.29; N, 3.53.

***N*-Cbz--(2-trifluoromethanesulfonyloxyphenyl)-α-dehydroalanine methyl ester 1b**

To a solution of *N*-(benzyloxycarbonyl)-α-phosphonoglycine trimethyl ester(662 mg, 2 mmol) and 2-formylphenyl trifluoromethanesulfonate2 (508 mg, 2 mmol) in THF (8 ml) was added DBU (0.33 ml, 2.2 mmol) at room temperature. The whole mixture was stirred for 1 hr at room temperature and then poured into water, extracted with ethyl acetate (x 3), washed with water (x 2), brine, and then dried over Na2SO4 and concentrated in vacuo to give crude product. The crude product was purified by chromatography on silica gel using hexane:ethyl acetate (4:1) to afford 776 mg (85%) of **1b** as a colorless solid.

mp 57-58 C (diethyl ether-hexane). 1H-NMR (CDCl3)  (ppm): 3.87 (3H, s), 5.05 (2H, s), 6.63 (1H, brs), 7.25-7.42 (9H, m), 7.57 (1H, d, *J* = 7.4 Hz). IR  cm-1: 3274, 1735, 1690, 1507. MS *m/z*: 459 (M+). HRMS Calcd for C19H16F3NO7S: 459.0600, Found: 459.0588. Anal. Calcd for C19H16F3NO7S:C, 49.67; H, 3.51; N, 3.05. Found: C, 49.62; H, 3.71; N, 3.17.

**Methyl *N*-Cbz-2-indolecarboxylate 2 from 1a**

To a solution of **1a** (195 mg, 0.5 mmol), and tris-(dibenzylideneacetone)dipalladium(0)·CHCl3 (23 mg, 0.025 mmol) in toluene (3 ml) was added 0.5 M toluene solution of tri-*t*-butylphosphine (0.2 ml, 0.1 mmol), and *N,N*-dicyclohexyl-*N*-methylamine (0.13ml, 0.6 mmol) at room temperature. The whole mixture were stirred for 30 minutes at 80 C, and then poured into water. The organic phase was separated and aqueous phase was extracted with EtOAc (x 2). The combined extracts were washed with water (x 2), brine, dried over Na2SO4 and evaporated to afford the crude product. The crude material was purified by chromatography on silica gel using diethyl ether:hexane (5:1) to afford 152 mg (98%) of **2** as a colorless viscous oil.

1H-NMR (CDCl3)  (ppm): 3.73 (3H, s), 5.42 (2H, s), 7.14 (1H, s), 7.26-7.46 (7H, m), 7.61 (1H, d, *J* = 8.5 Hz), 8.09 (1H, d, *J* = 8.5 Hz). 13C-NMR (CDCl3)  (ppm): 52.32, 69.66, 115.05, 115.71, 122.27, 123.66, 127.10, 127.63, 128.71, 128.77, 128.82, 130.32, 134.45, 137.62, 150.69, 162.22. IR  cm-1: 1727, 1202. MS *m/z*: 309 (M+). HRMS Calcd for C18H15NO4: 309.1001, Found: 309.1033.

**Methyl *N*-Cbz-2-indolecarboxylate 2 from 1b**

To a solution of **1b** (183 mg, 0.4 mmol), and tris-(dibenzylideneacetone)dipalladium(0)·CHCl3 (11 mg, 0.012 mmol) tri-*t*-butylphosphonium tetrafluoroborate (13.9 mg, 0.048 mmol) in DMF (2.4 ml) was added *N,N*-dicyclohexyl-*N*-methylamine (0.1ml, 0.48 mmol) at room temperature. The whole mixture were stirred for 12 h at 100 C, and then poured into water, extracted with EtOAc (x 2). The combined extracts were washed with water (x 2), brine, dried over Na2SO4 and evaporated to afford the crude product. The crude material was purified by chromatography on silica gel using diethyl ether:hexane (5:1) to afford 106 mg (87%) of **2** as a colorless viscous oil.

**The support-bound *N*-Acetyl-dehydroalanine 3** 3

To a mixture of hydroxymethyl polystyrene resin (4.8 g, 7 mmol, 1.46 mmol g-1), 2-acetamidoacrylic acid (4.52 g, 35 mmol) and triphenylphosphine (9.2 g, 35 mmol) in THF (72 ml), 40% solution of diethyl azodicarboxylate (16 ml, 35 mmol) in toluene was dropwised at room temperature. The mixture was gently stirred for 24 hr at room temperature. The resin was collected by filtration and washed with THF (x 3), CH2Cl2 (x 3), MeOH (x 3), CH2Cl2 (x 3), MeOH (x 3) and the resin was dried under reduced pressure at 40 ºC. The loading was determined from the isolated yield of methyl-2-acetamidoacrylate cleaved from the resin by the treatment with 10% triethylamine in MeOH at 50 ºC for 8 h as 0.95 mmol g-1.

IR  cm-1: 3398, 1717, 1696.

**Methyl 2-acetamidoacrylate**

mp 47-49 C. 1H-NMR (CDCl3)  (ppm): 2.13 (3H, s), 3.85 (3H, s), 5.88 (1H, s), 6.60 (1H, s), 7.73 (1H, brs), 7.95 (1H, s), 8.00 (1H, d, *J* = 8.0 Hz). IR  cm-1: 3361, 1706, 1673, 1507. MS *m/z*: 143 (M+). HRMS Calcd for C6H9NO3: 143.0582, Found: 143.0544.

**The support-bound -Acetamido--(2-bromophenyl)-acrylate 5a**

To a mixture of immobilized 2-acetamidoacrylate **3** (2 g, 1.9 mmol, 0.95mmol g-1), tris(dibenzylideneacetone)dipalladium(0) ·CHCl3 (130 mg, 0.14 mmol), and triethylamine (4 ml, 28.5 mmol) in DMF (18 ml) was added 1-bromo-2-iodobenzene(0.74 ml, 5.7 mmol) at room temperature. The whole mixture was gently stirred for 24 hr at 100 C. The resin was collected by filtration and washed with DMF (x 3), DMF:H2O=1 : 1 (x 3), THF (x 3), MeOH (x 3) and the resin was dried under reduced pressure at 40 ºC. The loading was determined from the isolated yield of methyl--acetamido--(2-bromophenyl)-acrylate cleaved from the resin by the treatment with 10% triethylamine in MeOH at 50 ºC for 12 h as 0.51 mmol g-1.

IR  cm-1: 3024, 2921, 1700, 1684, 1239.

**Methyl -acetamido--(2-bromophenyl)-acrylate**

mp 138-139 C (diethyl ether). 1H-NMR (CDCl3)  (ppm): 2.04 (3H, brs), 3.88 (3H, s), 7.02 (1H, brs), 7.18-7.44 (4H, m), 7.62 (1H, d, *J* = 8.0 Hz). IR  cm-1: 3147, 3000, 1719, 1654. MS *m/z*: 297 (M+). HRMS Calcd for C12H12BrNO3: 297.0001, Found: 296.9959.

**The support-bound -*N*-Cbz--(2-bromophenyl)-acrylate 5b**

A mixture of immobilized -diazophosphonoacetate4 (1.0 g, 1.1 mmol), benzyl carbamate (831 mg, 5.5 mmol), Rh2(OAc)4 (23 mg, 0.055 mmol) and toluene (10 ml) was heated at 100 ºC for 7 h. The resin was collected by filtration and washed with toluene (x 3), DMF (x 3), THF (x 3), CH2Cl2 (x 3), MeOH (x 3) and the resin was dried under reduced pressure at 40 ºC. The loading of **4** was estimated by elemental analysis for nitrogen as 0.87 mmol g-1. (N; 1.22%)

DBU (0.49 ml, 3.3 mmol) was added to the above resin **4** in THF (10 ml) and agitated for 5 minutes then 2-bromobenzaldehyde (0.39 ml, 3.3 mmol) was added and agitated for 12 h at room temperature. The resin was collected by filtration and washed with THF (x 3), DMF (x 3), THF (x 3), CH2Cl2 (x 3), MeOH (x 3) and the resin was dried under reduced pressure at 40 ºC. The loading of **5b** was estimated by elemental analysis for nitrogen as 0.79 mmol g-1. (N; 1.1%)

IR  cm-1: 3021, 2919, 1719.

**Methyl 2-indolecarboxylate 6 using resin 5a**

To a mixture of resin **5a** (400 mg, 0.2 mmol), tris(dibenzylideneacetone)dipalladium(0)·CHCl3 (19 mg, 0.02 mmol), and *N,N*-dicyclohexyl-*N*-methylamine (0.13 ml, 0.6 mmol) in toluene (4 ml) was added 0.5 M toluene solution of tri-*t*-butylphosphine (0.16 ml, 0.08 mmol), and then heated at 80 ºC for 12 h. The resin was collected by filtration and washed with DMF (x 3), DMF:H2O=1:1 (x 3), DMF (x 3), THF (x 3), MeOH (x 3) and the resin was dried under reduced pressure at 40 ºC. The above resin and NaOMe (11mg, 0.2 mmol) in THF (4 ml) and MeOH (2 ml) was agitated at room temperature for 12 h. The resin was separated by filtration and washed with ethyl acetate, filtrate was washed with saturated aqueous NH4Cl, water and brine, dried over Na2SO4 and evaporated to afford the crude product. The crude product was purified by chromatography on silica gel using hexane: ethyl acetate (4:1) to afford 36 mg (99%) of **6** as a colorless solid.

mp 150-151 C (ethyl acetate-hexane); *lit*.5 mp 148-150 C. 1H-NMR (CDCl3)  (ppm): 3.95 (3H, s), 7.14-7.45 (4H, m), 7.70 (1H, d, *J* = 8.0 Hz), 8.89 (1H, brs). IR  cm-1: 3330, 1696, 1684. MS *m/z*: 175 (M+). HRMS Calcd for C10H9NO2: 175.0633, Found: 175.0609.

**Methyl 2-indolecarboxylate 6 using resin 5c**

To a mixture of resin **5c** (300 mg, 0.27 mmol), tris(dibenzylideneacetone)dipalladium(0)·CHCl3 (51 mg, 0.055 mmol), tri-*t*-butylphosphonium tetrafluoroborate (64mg, 0.22 mmol) and *N,N*-dicyclohexyl-*N*-methylamine (0.24 ml, 1.1 mmol) in DME (2.8 ml) was heated at 100 ºC for 38 h. The resin was collected by filtration and washed with DMF (x 3), DMF:H2O=1:1 (x 3), DMF (x 3), THF (x 3), MeOH (x 3) and the resin was dried under reduced pressure at 40 ºC. The above resin and NaOMe (30mg, 0.55 mmol) in THF (4 ml) and MeOH (2 ml) was agitated at room temperature for 12 h. The resin was separated by filtration and washed with ethyl acetate, filtrate was washed with saturated aqueous NH4Cl, water and brine, dried over Na2SO4 and evaporated to afford the crude product. The crude product was purified by chromatography on silica gel using hexane: ethyl acetate (4:1) to afford 20 mg (48%) of **6** as a colorless solid.

**The tandem procedure for Methyl 2-indolecarboxylate 6 on a polymer support**

To a mixture of resin **3** (300 mg, 0.285 mmol, 0.95 mmol g-1), 1,2-dibromobenzene (0.051 ml, 0.428 mmol) tris(dibenzylideneacetone)dipalladium(0)·CHCl3 (39 mg, 0.043 mmol) and *N,N*-dicyclohexyl- *N*-methylamine (0.18 ml, 0.855 mmol) in toluene (3 ml) was added 0.5 M toluene solution of tri-*t*-butylphosphine (0.34 ml, 0.17 mmol) and then heated at 100 ºC for 24 h. The resin was collected by filtration and washed with DMF (x 3), DMF:H2O=1:1 (x 3), DMF (x 3), THF (x 3), MeOH (x 3) and the resin was dried under reduced pressure at 40 ºC. The above resin and NaOMe (15mg, 0.285 mmol) in THF (3 ml) and MeOH (1.5 ml) was agitated at room temperature for 16 h. The resin was separated by filtration and washed with ethyl acetate, the filtrate was washed with saturated aqueous NH4Cl, water and brine, dried over Na2SO4 and evaporated to afford the crude product. The crude product was purified by chromatography on silica gel using hexane: ethyl acetate (4:1) to afford 39 mg (78%) of **6** as a colorless solid.

**Methyl 3-isoquinolinecarboxylate 7 on a polymer support**

To a mixture of resin **3** (500 mg, 0.475 mmol), 2-bromobenzaldehyde (0.17ml, 1.425 mmol), tris(dibenzylideneacetone)dipalladium(0)·CHCl3 (33 mg, 0.036 mmol), tri-*t*-butylphosphonium tetrafluoroborate (41mg, 0.143 mmol) and *N,N*-dicyclohexyl- *N*-methylamine (0.31 ml, 1.43 mmol) in toluene (4 ml) was heated at 100 ºC for 18 h. The resin was collected by filtration and washed with DMF (x 3), DMF:H2O=1:1 (x 3), DMF (x 3), THF (x 3), MeOH (x 3) and the resin was dried under reduced pressure at 40 ºC. The above resin and NaOMe (26mg, 0.475 mmol) in THF (4 ml) and MeOH (2 ml) was agitated at room temperature for 7 h. The resin was separated by filtration and washed with ethyl acetate, the filtrate was washed with saturated aqueous NH4Cl, water and brine, dried over Na2SO4 and evaporated to afford the crude product. The crude product was purified by chromatography on silica gel using hexane: ethyl acetate (1:1) to afford 50 mg (56%) of **7** as a colorless solid.

mp 77-79 C (diethyl ether-hexane); *lit*.6 mp 70-71C. 1H-NMR (CDCl3)  (ppm): 4.08 (3H, s), 7.73-7.85 (2H, m), 7.99 (1H, d, *J* = 7.7 Hz), 8.08 (1H, d, *J* = 7.7 Hz), 8.62 (1H, s), 9.35 (1H, s). IR  cm-1: 1723, 1437, 1291, 1094. MS *m/z*: 187 (M+). HRMS Calcd for C11H9NO2: 187.0633, Found: 187.0592.

**Methyl 3-isoquinolonecarboxylate 87 on a polymer support**

To a mixture of resin **3** (500 mg, 0.475 mmol), methyl 2-bromobenzoate (1.425 mmol), tris(dibenzylideneacetone)dipalladium(0)·CHCl3 (33 mg, 0.036 mmol), tri-*t*-butylphosphonium tetrafluoroborate (41mg, 0.143 mmol) and *N,N*-dicyclohexyl- *N*-methylamine (0.31 ml, 1.425 mmol) in toluene (4 ml) was heated at 100 ºC for 24 h. The resin was collected by filtration and washed with DMF (x 3), DMF:H2O=1:1 (x 3), DMF (x 3), THF (x 3), MeOH (x 3) and the resin was dried under reduced pressure at 40 ºC. The above resin and NaOMe (26mg, 0.475 mmol) in THF (4 ml) and MeOH (2 ml) was agitated at room temperature for 6 h. The resin was separated by filtration and washed with ethyl acetate, the filtrate was washed with saturated aqueous NH4Cl, water and brine, dried over Na2SO4 and evaporated to afford the crude product. The crude product was purified by chromatography on silica gel using hexane: ethyl acetate (1:1) to afford 58 mg (60%) of **8** as a colorless solid.

mp 160-162 C (ethyl acetate-hexane); *lit*.7 mp 158-159.5 C

1H-NMR (CDCl3 / TMS)  (ppm): 4.00 (3H, s), 7.38 (1H, s), 7.61-7.77 (3H, m), 8.47 (1H, d, *J* = 8.0 Hz), 9.17 (1H, brs).　IR  cm-1: 3166, 3056, 2954, 1725, 1656.　MS *m/z*: 203 (M+).

HRMS Calcd for C11H9O3N: 203.0582, Found: 203.0607.

References

1. F. Bertj, C. Ebert and L. Gardossi, *Tetrahedron Lett*. 1992, **33**, 8145.
2. A. M. Echavarren and J. K. Stille, *J. Am. Chem. Soc.* 1987, **109**, 5478.
3. M. Barbaste, V. Rolland-Fulcrand, M.-L. Roumestant, P. Viallefont and J. Martinez, *Tetrahedron Lett.* 1998, **39**, 6287.
4. K. Yamazaki and Y. Kondo, *Chem. Commun.* 2002, 210.
5. P. Hamel, N. Zajact, J. G. Atkinson and Y. Girard, *Tetrahedron Lett*. 1993, **34**, 2059.
6. M. Cain, R. W. Weber, F. Guzman, J. M. Cook, S. A. Barker, K. C. Rice, J. N. Crawley, S. M. Paul and P. Skolnick, *J. Med. Chem*. 1982, **25**, 1081.
7. K. Nunami, M. Suzuki and N. Yoneda, *J. Org. Chem*. 1979, **44**, 1887.
